# Supplementary material for: Effects of DHA-Rich n-3 Fatty Acid Supplementation and/or Resistance Training on Body Composition and Cardiometabolic Biomarkers in Overweight and Obese Post-Menopausal Women
Source: MDPI journal article supplement (doi:10.3390/nu13072465), 2021-07-19
Supplement: s1 [file s1]

# Effects of DHA-Rich n-3 Fatty Acid Supplementation and/or Resistance Training on Body Composition and Cardiometabolic Biomarkers in Overweight and Obese Post-Menopausal Women

Elisa Félix-Soriano <sup>1,2</sup>, Alejandro Martínez-Gayo <sup>1,2</sup>, María José Cobo <sup>1,2</sup>, Adriana Pérez-Chávez <sup>1,2</sup>, Javier Ibáñez-Santos <sup>3</sup>, Natalia Palacios Samper <sup>3</sup>, Iñaki Goikoetxea Galarza <sup>3</sup>, Marta Cuervo <sup>1,2,4</sup>, Marisol García-Unciti <sup>1</sup>, Pedro González-Muniesa <sup>1,2,4,5</sup>, Silvia Lorente-Cebrián <sup>1,2,4</sup> and María J. Moreno-Aliaga <sup>1,2,4,5,\*</sup>

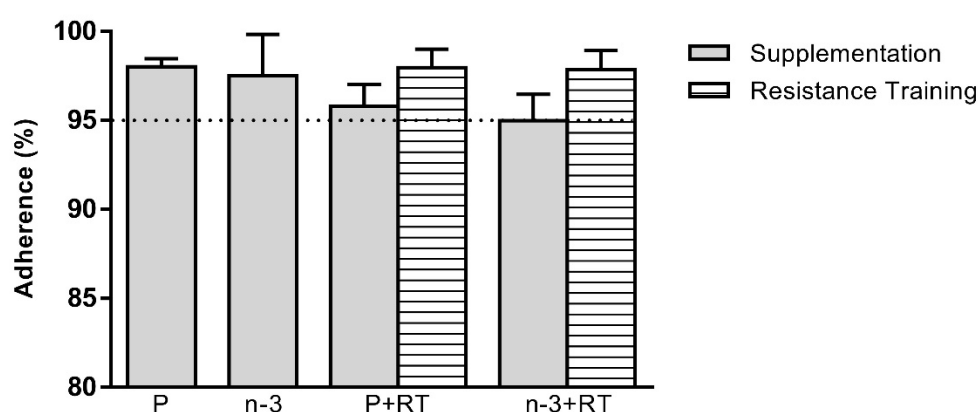

**Figure S1.** Adherence to supplements intake and resistance training program in the four intervention groups. P: placebo group, n-3: DHA-rich n-3 PUFA supplemented group; P+RT: placebo + resistance training group; n-3+RT: DHA-rich n-3 PUFA supplemented + resistance training group. Data are mean  $\pm$  SEM.

**Table S1.** Fatty acid composition of the olive oil capsules used as placebo.

| Fatty acid                         | (g/100 g fat) |
|------------------------------------|---------------|
| Caprylic C8:0                      | 0.09          |
| Capric C10:0                       | ND            |
| Lauric C12:0                       | ND            |
| Myristic C14:0                     | ND            |
| Palmitic C16:0                     | 10.43         |
| <i>t</i> -Palmitoleic C16:1        | ND            |
| Palmitoleic C16:1n-7               | 0.63          |
| Stearic C18:0                      | 2.78          |
| $\Sigma$ Trans isomers C18:1       | 0.32          |
| Oleic C18:1 n-9                    | 67.26         |
| <i>c</i> -Vaccenic C18:1 n-7       | 1.85          |
| <i>t</i> -Linoleic C18:2           | ND            |
| <i>c</i> - <i>t</i> Linoleic C18:2 | 0.24          |
| <i>t</i> - <i>c</i> Linoleic C18:2 | 0.06          |
| Linoleic C18:2 n-6                 | 9.97          |
| Arachidic C20:0                    | 0.37          |
| $\gamma$ -Linolenic C18:3 n-6      | ND            |
| Eicosenoic C20:1 n-9               | 0.23          |
| $\alpha$ -Linolenic C18:3 n-3      | 0.67          |
| Stearidonic C18:4 n-3              | ND            |
| Eicosadienoic C20:2 n-6            | 0.11          |
| Behenic C22:0                      | 0.14          |
| <i>t</i> -Brassicidic C20:1        | ND            |
| Erucic C22:1 n-9                   | ND            |
| Eicosatrienoic C20:3 n-3           | ND            |
| Arachidonic C20:4 n-6              | ND            |
| Eicopentaenoic C20:5 n-3           | ND            |
| Nervonic C24:1 n-9                 | ND            |
| Docosatrienoic C22:3 n-9           | ND            |
| Docosapentaenoic C22:5 n-6         | ND            |
| Lignoceric C24:0                   | ND            |
| Docosapentaenoic C22:5 n-3         | ND            |
| Docosahexaenoic C22:6 n-3          | ND            |

Table S2. Baseline characteristics of the study population.

|                                 | P                            | n-3                | P+RT                        | n-3+RT                      | <i>p</i> <sup>a</sup> |
|---------------------------------|------------------------------|--------------------|-----------------------------|-----------------------------|-----------------------|
| Number of subjects              | 20                           | 15                 | 20                          | 16                          |                       |
| Age (years)                     | 58.75 ± 3.39                 | 58.00 ± 2.78       | 58.95 ± 3.46                | 58.13 ± 3.14                | ns                    |
| Weight (kg)                     | 76.75 ± 6.04                 | 80.34 ± 8.51       | 77.76 ± 7.92                | 80.57 ± 6.60                | ns                    |
| Height (m)                      | 1.59 ± 0.06                  | 1.62 ± 0.06        | 1.59 ± 0.06                 | 1.61 ± 0.06                 | ns                    |
| BMI (kg/m <sup>2</sup> )        | 30.25 ± 2.30                 | 30.39 ± 1.94       | 30.79 ± 2.34                | 31.07 ± 1.82                | ns                    |
| Fat mass (%)                    | 47.44 ± 3.42                 | 45.55 ± 2.38       | 47.05 ± 3.96                | 46.70 ± 2.90                | ns                    |
| Lean mass (%)                   | 49.76 ± 3.20                 | 51.52 ± 2.18       | 50.16 ± 3.78                | 50.53 ± 2.76                | ns                    |
| Visceral fat (kg)               | 1.30 ± 0.44                  | 1.37 ± 0.44        | 1.27 ± 0.51                 | 1.18 ± 0.47                 | ns                    |
| BMC (g)                         | 2152.65 ± 308.05             | 2366.33 ± 332.76   | 2156.10 ± 231.21            | 2240.31 ± 258.36            | ns                    |
| Waist circumference (cm)        | 93.11 ± 4.57                 | 95.00 ± 7.63       | 92.67 ± 5.47                | 93.90 ± 7.16                | ns                    |
| Hip circumference (cm)          | 110.68 ± 7.14                | 112.50 ± 5.78      | 110.65 ± 5.74               | 113.35 ± 6.82               | ns                    |
| Waist/Hip Ratio                 | 0.84 ± 0.04                  | 0.85 ± 0.06        | 0.84 ± 0.06                 | 0.83 ± 0.08                 | ns                    |
| Arms weight (kg)                | 8.65 ± 0.89                  | 8.60 ± 1.17        | 8.73 ± 1.21                 | 8.83 ± 1.04                 | ns                    |
| Arms fat mass (kg)              | 4.36 ± 0.60                  | 4.01 ± 0.68        | 4.32 ± 0.68                 | 4.24 ± 0.71                 | ns                    |
| Arms lean mass (kg)             | 4.02 ± 0.56                  | 4.30 ± 0.60        | 4.13 ± 0.66                 | 4.29 ± 0.47                 | ns                    |
| Legs weight (kg)                | 25.10 ± 3.59                 | 27.52 ± 3.28       | 26.55 ± 3.91                | 27.11 ± 3.95                | ns                    |
| Legs fat mass (kg)              | 11.29 ± 2.58                 | 12.16 ± 2.38       | 12.36 ± 2.88                | 12.18 ± 2.47                | ns                    |
| Legs lean mass (kg)             | 13.03 ± 1.57                 | 14.51 ± 1.66       | 13.40 ± 1.64                | 14.11 ± 1.88                | ns                    |
| Arm circumference (cm)          | 34.87 ± 1.49                 | 34.02 ± 2.30       | 34.59 ± 2.31                | 35.56 ± 2.39                | ns                    |
| Tricipital skinfold (mm)        | 31.85 ± 5.15                 | 31.04 ± 3.91       | 32.95 ± 3.88                | 33.28 ± 5.42                | ns                    |
| Thigh circumference (cm)        | 56.42 ± 4.54                 | 56.75 ± 3.48       | 59.71 ± 5.21                | 60.42 ± 6.42                | ns                    |
| Calf circumference (cm)         | 38.05 ± 2.12                 | 39.59 ± 2.58       | 40.15 ± 2.41                | 39.30 ± 2.55                | ns                    |
| Thigh skinfold (mm)             | 39.92 ± 4.76                 | 41.25 ± 5.49       | 42.67 ± 2.99                | 41.06 ± 5.37                | ns                    |
| Calf skinfold (mm)              | 31.07 ± 5.28                 | 32.02 ± 5.60       | 33.26 ± 4.88                | 34.76 ± 5.45                | ns                    |
| Lower limbs muscle strength     | 2.24 ± 0.38                  | 2.26 ± 0.46        | 2.19 ± 0.40                 | 2.01 ± 0.28                 | ns                    |
| Upper limbs muscle strength     | 0.44 ± 0.08                  | 0.44 ± 0.10        | 0.45 ± 0.08                 | 0.44 ± 0.05                 | ns                    |
| Lower limbs muscle quality      | 11.64 ± 3.38                 | 11.86 ± 2.24       | 11.98 ± 1.81                | 10.89 ± 1.26                | ns                    |
| Upper limbs muscle quality      | 7.40 ± 2.07                  | 7.94 ± 1.59        | 8.05 ± 1.14                 | 7.62 ± 0.99                 | ns                    |
| SBP (mmHg)                      | 121.83 ± 19.68               | 119.18 ± 7.98      | 122.73 ± 14.96              | 123.67 ± 9.01               | ns                    |
| DBP (mmHg)                      | 80.04 ± 12.38                | 79.71 ± 6.05       | 79.08 ± 7.88                | 81.62 ± 6.67                | ns                    |
| TG (mg/dL)                      | 92.64 ± 29.47                | 118.20 ± 55.31     | 110.90 ± 51.66              | 101.34 ± 33.26              | ns                    |
| Total Chol (mg/dL)              | 237.40 ± 30.79               | 239.73 ± 46.41     | 254.50 ± 27.83              | 250.31 ± 45.89              | ns                    |
| LDL-Chol (mg/dL)                | 153.31 ± 32.65               | 154.20 ± 36.89     | 168.40 ± 24.49              | 164.90 ± 44.04              | ns                    |
| HDL-Chol (mg/dL)                | 65.74 ± 16.77                | 61.89 ± 16.38      | 63.92 ± 14.61               | 65.15 ± 11.03               | ns                    |
| Glucose (mg/dL)                 | 98.57 ± 13.03 <sup>1,2</sup> | 103.90 ± 15.72     | 109.14 ± 18.90 <sup>1</sup> | 108.35 ± 11.32 <sup>2</sup> | 0.034                 |
| AUC (mg min/dL)                 | 15901.53 ± 4295.75           | 17942.80 ± 4904.76 | 17563.05 ± 4007.59          | 18006.69 ± 3890.92          | ns                    |
| iAUC (mg min/dL)                | 4227.82 ± 3147.54            | 5652.67 ± 3787.17  | 5207.21 ± 3264.54           | 5260.25 ± 2934.61           | ns                    |
| Insulin                         | 10.02 ± 4.41                 | 9.90 ± 5.21        | 9.49 ± 5.00                 | 10.54 ± 4.05                | ns                    |
| HOMA-IR index                   | 2.51 ± 1.43                  | 2.48 ± 1.19        | 2.67 ± 1.86                 | 2.82 ± 1.14                 | ns                    |
| TyG index                       | 8.45 ± 0.45                  | 8.64 ± 0.41        | 8.64 ± 0.47                 | 8.59 ± 0.39                 | ns                    |
| PA (METs-h/week) <sup>b</sup>   | 32.78 ± 17.26                | 22.65 ± 16.99      | 22.69 ± 25.08               | 19.99 ± 13.47               | ns                    |
| MedDiet adherence (p14)         | 7.95 ± 1.91                  | 8.13 ± 1.77        | 8.11 ± 2.06                 | 7.81 ± 1.38                 | ns                    |
| Fat intake (g/day) <sup>c</sup> | 124.36 ± 50.13               | 127.53 ± 45.54     | 141.74 ± 95.16              | 134.60 ± 57.25              | ns                    |
| n-6/n-3 PUFA ratio <sup>c</sup> | 5.67 ± 2.03                  | 6.67 ± 4.45        | 5.26 ± 1.47                 | 5.61 ± 2.27                 | ns                    |

P: Placebo group, n-3: DHA-rich n-3 PUFA supplemented group; P+RT: Placebo + resistance training group; n-3+RT: DHA-rich n-3 PUFA supplemented + resistance training group; BMC: Bone mineral content; SBP: systolic blood pressure; DBP: diastolic blood pressure; TG: Triglycerides; Total Chol: Total Cholesterol; LDL-Chol: LDL-Cholesterol; HDL-Chol: HDL-Cholesterol; TyG: Triglycerides to Glucose index; PA: Physical Activity; MET: Metabolic equivalent of the task; MedDiet adherence: Mediterranean Diet adherence. Data are mean ± SD.

<sup>a</sup>Data were analyzed by one-way ANOVA or Kruskal-Wallis after testing for normality and homoscedasticity of the samples. Tukey or Dunn's multiple testing correction were used accordingly. <sup>b</sup>Data obtained from the validated physical activity questionnaire [46]. <sup>c</sup>Data obtained from the validated food frequency questionnaire [45].

<sup>1,2</sup>Means that share a common superscript number were significantly different; ns, nonsignificant ( $p > 0.05$ ).

**Table S3.** Physical activity data, adherence to the Mediterranean diet, dietary fat intake and n-6/n-3 PUFA ratio in the four intervention groups.

|                                 | P                              | n-3                            | P+RT                          | n-3+RT                     | Two-way ANOVA <sup>c</sup> |    |        |
|---------------------------------|--------------------------------|--------------------------------|-------------------------------|----------------------------|----------------------------|----|--------|
| N                               | 20                             | 15                             | 20                            | 16                         | n-3                        | RT | n-3xRT |
| PA (METs-h/week) <sup>d</sup>   |                                |                                |                               |                            |                            |    |        |
| Baseline                        | 32.78 ± 17.26                  | 22.65 ± 16.99                  | 22.69 ± 25.08                 | 19.99 ± 13.47              |                            |    |        |
| Change                          | 3.15 ± 26.25                   | 0.50 ± 14.56                   | 4.90 ± 18.59                  | 3.98 ± 10.88               | ns                         | ns | ns     |
| SPA (%) <sup>e</sup>            | 62.98 ± 11.16                  | 61.91 ± 11.76                  | 57.96 ± 11.72                 | 58.21 ± 11.11              | ns                         | ns | ns     |
| LPA (%) <sup>e</sup>            | 29.48 ± 6.97                   | 32.67 ± 8.50                   | 31.50 ± 5.79                  | 33.69 ± 6.96               | ns                         | ns | ns     |
| MPA (%) <sup>e</sup>            | 7.18 ± 7.04                    | 5.37 ± 6.98                    | 10.32 ± 10.54                 | 8.07 ± 7.70                | ns                         | ns | ns     |
| VPA (%) <sup>e</sup>            | 0.37 ± 0.73                    | 0.06 ± 0.13                    | 0.23 ± 0.81                   | 0.03 ± 0.08                | ns                         | ns | ns     |
| MedDiet adherence               |                                |                                |                               |                            |                            |    |        |
| Baseline                        | 7.95 ± 1.91                    | 8.13 ± 1.77                    | 8.11 ± 2.06                   | 7.81 ± 1.38                |                            |    |        |
| Change                          | 1.55 ± 2.42 <sup>a,**</sup>    | 0.80 ± 2.11                    | 0.50 ± 2.18                   | 1.06 ± 2.18 <sup>a,†</sup> | ns                         | ns | ns     |
| Fat intake (g/day) <sup>f</sup> |                                |                                |                               |                            |                            |    |        |
| Baseline                        | 124.36 ± 50.13                 | 127.53 ± 45.54                 | 141.74 ± 95.16                | 134.60 ± 57.25             |                            |    |        |
| Changes                         | -27.69 ± 39.68 <sup>b,**</sup> | -25.30 ± 31.42 <sup>a,**</sup> | -44.93 ± 92.79 <sup>b,*</sup> | -21.94 ± 35 <sup>b,*</sup> | ns                         | ns | ns     |
| n-6/n-3 PUFA ratio <sup>f</sup> |                                |                                |                               |                            |                            |    |        |
| Baseline                        | 5.67 ± 2.03                    | 6.67 ± 4.45                    | 5.26 ± 1.47                   | 5.61 ± 2.27                |                            |    |        |
| Changes                         | -0.52 ± 2.14                   | -1.25 ± 3.36                   | -0.89 ± 1.53 <sup>a,*</sup>   | -0.67 ± 2.22               | ns                         | ns | ns     |

P: Placebo group, n-3: DHA-rich n-3 PUFA supplemented group; P+RT: Placebo + resistance training group; n-3+RT: DHA-rich n-3 PUFA supplemented + resistance training group; PA: Physical Activity; MET: Metabolic equivalent of the task; SPA: sedentary physical activity; LPA: light physical activity; MPA: moderate physical activity; VPA: vigorous physical activity; MedDiet adherence: Mediterranean Diet adherence. Data are mean ± SD.

<sup>a</sup> Paired Student's *t*-test. <sup>b</sup> Wilcoxon's signed-rank test. <sup>c</sup> Differences in changes (16 weeks – baseline) between groups were evaluated by two-way ANOVA. <sup>d</sup> Data obtained from a validated physical activity questionnaire [46]. <sup>e</sup> Data obtained from 1-week recorded accelerometry. <sup>f</sup> Data obtained from the validated food frequency questionnaire [45].

\*\*  $p < 0.01$ , \*  $p < 0.05$ , <sup>†</sup>  $p$  trend ( $p = 0.07$ ) vs. baseline; ns, nonsignificant ( $p > 0.05$ ).

**Table S4.** Effects of 16 weeks of DHA-rich n-3 PUFA (n-3) supplementation and/or resistance training (RT) on arms anthropometric measurements in overweight/obese postmenopausal women.

|                              | P                             | n-3                           | P+RT                          | n-3+RT                        | Two-way ANOVA <sup>b</sup> |    |        |
|------------------------------|-------------------------------|-------------------------------|-------------------------------|-------------------------------|----------------------------|----|--------|
| N                            | 20                            | 15                            | 20                            | 16                            | n-3                        | RT | n-3xRT |
| Arm circumference (cm)       |                               |                               |                               |                               |                            |    |        |
| Baseline                     | 34.87 ± 1.49                  | 34.02 ± 2.30                  | 34.59 ± 2.31                  | 35.56 ± 2.39                  |                            |    |        |
| Change                       | -1.18 ± 1.32 <sup>a,***</sup> | -1.09 ± 0.82 <sup>a,***</sup> | -0.98 ± 0.96 <sup>a,***</sup> | -1.35 ± 1.16 <sup>a,***</sup> | ns                         | ns | ns     |
| Adjusted change <sup>c</sup> | -1.22(0.21) <sup>a,***</sup>  | -1.05(0.14) <sup>a,***</sup>  | -1.01(0.20) <sup>a,***</sup>  | -1.30(0.20) <sup>a,***</sup>  | ns                         | ns | ns     |
| Tricipital skinfold (mm)     |                               |                               |                               |                               |                            |    |        |
| Baseline                     | 31.85 ± 5.15                  | 31.04 ± 3.91                  | 32.95 ± 3.88                  | 33.28 ± 5.42                  |                            |    |        |
| Change                       | -2.99 ± 4.31 <sup>a,**</sup>  | -2.94 ± 2.88 <sup>a,**</sup>  | -4.18 ± 3.69 <sup>a,***</sup> | -4.05 ± 3.49 <sup>a,**</sup>  | ns                         | ns | ns     |
| Adjusted change <sup>c</sup> | -3.35(1.05) <sup>a,**</sup>   | -2.80(0.70) <sup>a,**</sup>   | -4.05(0.85) <sup>a,***</sup>  | -3.89(0.73) <sup>a,***</sup>  | ns                         | ns | ns     |

DHA: Docosahexaenoic Acid; PUFA: Polyunsaturated Fatty Acids; P: placebo group; n-3: DHA-rich n-3 PUFA supplemented group; P+RT: placebo + resistance training group; n-3+RT: DHA-rich n-3 PUFA supplemented + resistance training group. Data are as mean ± SD.

<sup>a</sup> Paired Student's *t*-test. <sup>b</sup> Differences in changes (16 weeks – baseline) between groups were evaluated by two-way ANOVA. <sup>c</sup> Means(SEM) adjusted by changes in body weight.

\*\*\* *p* < 0.001, \*\* *p* < 0.01 vs. baseline; ns, nonsignificant (*p* > 0.05).
